# Corrigendum. ART in Europe, 2015: results generated from European registries by ESHRE

The European IVF-monitoring Consortium (EIM) for the European Society of Human Reproduction and Embryology (ESHRE)

C De Geyter <sup>1,2\*</sup>, C Calhaz-Jorge<sup>3</sup>, M S Kupka<sup>4</sup>, C Wyns<sup>5</sup>, E Mocanu<sup>6</sup>, T Motrenko<sup>7</sup>, G Scaravelli<sup>8</sup>, J Smeenk<sup>9</sup>, S Vidakovic<sup>10</sup>, and V Goossens<sup>2</sup>

<sup>1</sup>Reproductive Medicine and Gynaecological Endocrinology (RME), University Hospital, University of Basel, Basel, Switzerland <sup>2</sup>ESHRE Central Office, Meerstraat 60, Grimbergen, Belgium <sup>3</sup>Faculdade de Medicina, Universidade de Lisboa, Lisbon, Portugal <sup>4</sup>Department of Gynaecology and Obstetrics, Fertility Center – Gynaekologicum, Hamburg, Germany <sup>5</sup>Cliniques Universitaires Saint-Luc, Université Catholique de Louvain, Brussels, Belgium <sup>6</sup>Department of Reproductive Medicine, Rotunda Hospital and RCSI, Dublin, Ireland <sup>7</sup>Human Reproduction Center, Budva, Montenegro <sup>8</sup>Istituto Superiore di Sanità, Registro Nazionale della Procreazione Medicalmente Assistita, Rome, Italy <sup>9</sup>Department of Obstetrics and Gynaecology, Elisabeth Twee Steden Ziekenhuis, Tilburg, the Netherlands <sup>10</sup>Institute of Obstetrics and Gynaecology, Clinical Center Serbia «GAK», Belgrade, Serbia

\*Correspondence address. Institute of Reproductive Medicine and Gynaecological Endocrinology (RME), Vogesenstrasse 134, CH-4031 Basel, Switzerland. Tel: +41 61 265 9315; E-mail: c.degeyter@unibas.ch  <https://orcid.org/0000-0002-0889-6310>

*Human Reproduction Open*, Volume 2020, Issue 1, 2020, hoz038,  
<https://doi.org/10.1093/hropen/hoz038>

The Authors would like to apologise for the incorrect spelling of the name of one of the contributors from Lithuania.

leva Masiukaite name was incorrectly spelled Leva Masiukaite.

The electronic version of this article has been updated at <https://doi.org/10.1093/hropen/hoz038>. The Authors would like to reassure readers that this does not affect any other content of the article.
